# Supplementary material
Source: PubMed Central journal article supplement (PMC4530436)

## **SUPPORTING INFORMATION**

### **Modeling Suggests TRPC3 Hydrogen Bonding and Not Phosphorylation Contributes to the Ataxia Phenotype of the *Moonwalker* Mouse**

Sonya M. Hanson, Mark S. P. Sansom, Esther B. E. Becker

### Supplemental Tables S1-S3

In the following tables, the number of models seen for each potential hydrogen bonding partner to the T635 hydroxyl are listed. Partners in bold are those investigated more thoroughly in the main text. At the bottom are the most frequently seen hydrogen bonding partners, usually those adjacent to T635 also on the S4-S5 linker.

**Table S1. Summary of models.** All 100 models of the multi-template apo TRPV1 (PDB ID: 3J5P) – Kv – chimera structure (PDB ID: 2R9R) are analyzed.

| Number of models | T635 as Donor or Acceptor | T635 H-Bond Partner |
|------------------|---------------------------|---------------------|
| 1                | Acceptor                  | <b>Y736</b>         |
| 5                | Both                      | T635                |
| 8                | Either                    | <b>R634</b>         |
| 8                | Donor                     | <b>D638</b>         |
| 22               | Donor                     | L632                |
| 23               | Donor                     | V636                |
| 48               | Donor                     | S631                |

**Table S2. Summary of models.** The top 10 models according to the MODELLER scoring function are analyzed for the variety of templates used. Multi-template models are TRPV1 apo (PDB ID: 3J5P), RTX/DkTX-bound (PDB ID: 3J5Q), or capsaicin-bound (PDB ID: 3J5R) structures with the S4-S5 linker of the Kv-chimera structure (PDB ID: 2R9R).

| Number of models | Template (S1 – S6 region) | T635 H-Bond Partner |
|------------------|---------------------------|---------------------|
| 2                | Multi-template (3J5P)     | <b>R634</b>         |
| 2                | Multi-template (3J5P)     | L632                |
| 4                | Multi-template (3J5P)     | V636                |
| 7                | Multi-template (3J5P)     | S631                |
|                  |                           |                     |
| 1                | 3J5P                      | <b>D638</b>         |
| 2                | 3J5P                      | L632                |
| 3                | 3J5P                      | S631                |
| 4                | 3J5P                      | V636                |
|                  |                           |                     |
| 1                | 2R9R                      | <b>I732</b>         |
| 1                | 2R9R                      | T635                |
| 2                | 2R9R                      | L632                |
| 3                | 2R9R                      | V636                |
| 5                | 2R9R                      | S631                |
|                  |                           |                     |
| 1                | Multi-template (3J5Q)     | L632                |
| 2                | Multi-template (3J5Q)     | V636                |
| 2                | Multi-template (3J5Q)     | <b>R634</b>         |
| 2                | Multi-template (3J5Q)     | T635                |
| 4                | Multi-template (3J5Q)     | S631                |
|                  |                           |                     |
| 1                | Multi-template (3J5R)     | T635                |
| 1                | Multi-template (3J5R)     | L632                |
| 5                | Multi-template (3J5R)     | V636                |
| 6                | Multi-template (3J5R)     | S631                |

**Table S3. Summary of models.** Analysis of the initial ten models on 2R9R, for which modeling was performed separately from the 100 models in *Table S2* and before the existence of any TRPV1 structures.

| <b>Number of models</b> | <b>T635 as Donor or Acceptor</b> | <b>T635 H-Bond Partner</b> |
|-------------------------|----------------------------------|----------------------------|
| 1                       | Acceptor                         | <b>S735</b>                |
| 1                       | Both                             | T635                       |
| 2                       | Donor                            | V636                       |
| 4                       | Donor                            | S631                       |

## Supplemental Figures

**Figure S1. Procheck analysis for models with novel T635 hydrogen-bonding partners.** A series of Ramachandran plot analyses for six models of mTRPC3, showing broadly reasonable models. The analysis was performed using the PROCHECK tool. PDB coordinates for these six models have been made available.

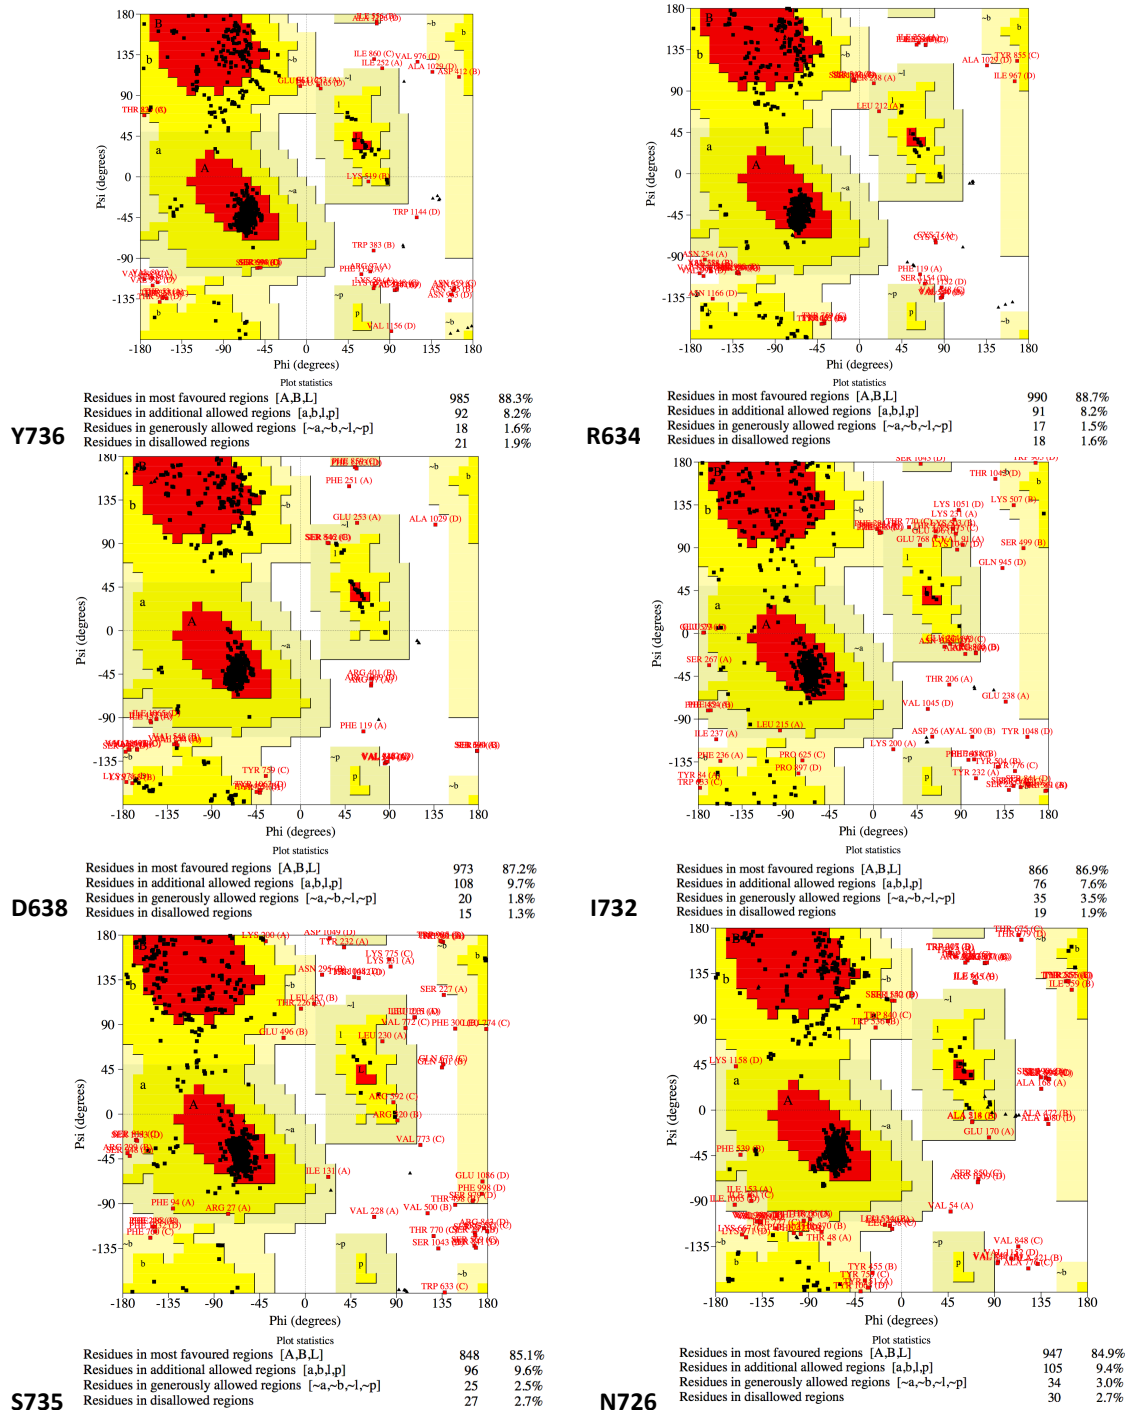

**Figure S2.** The TRPC3 mutants S735L and S735V did not induce significant amounts of cell death compared to wild-type (WT) TRPC3 upon overexpression in Neuro-2a cells (mean±SEM, n=3, ANOVA followed by Newman-Keuls post-hoc test)

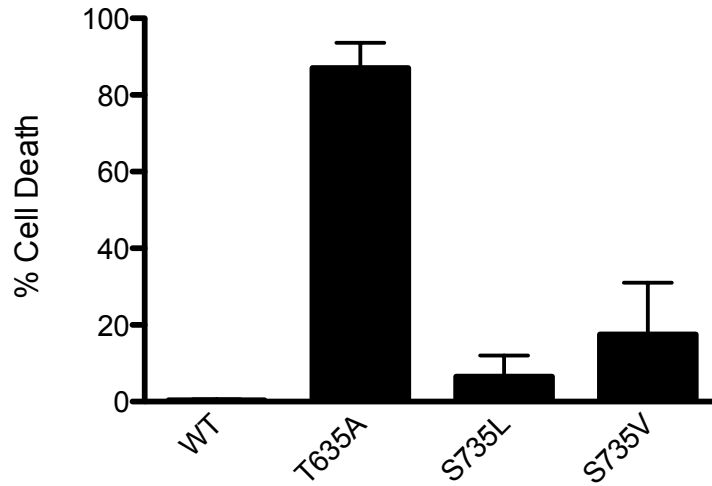

Supplement: bi5b00235_si_001.pdf [file bi5b00235_si_001.pdf]
